# Supplementary material for: Broncho Vaxom (OM-85) modulates rhinovirus docking proteins on human airway epithelial cells via Erk1/2 mitogen activated protein kinase and cAMP
Source: PubMed Central journal article supplement (PMC5705076; doi:10.1371/journal.pone.0188010), 2017-11-28
Supplement: pone.0188010.s001.pdf [file pone.0188010.s001.pdf]

Data

**Figure 2:** 100 cells were counted based on nucleus staining and within these cells the number of RV positives was counted. The procedure was repeated on the same slide in two randomly selected areas.

| RV positive cells of 100 |         |        |            |  |         |         |            |
|--------------------------|---------|--------|------------|--|---------|---------|------------|
| Day1                     |         |        |            |  |         |         |            |
|                          | count 1 | count2 | mean       |  | count 1 | count 2 | mean       |
| <b>controls</b>          |         |        | RV         |  |         |         | OM 10      |
| 1                        | 81      | 89     | 85.0       |  | 51.0    | 58.0    | 54.5       |
| 2                        | 75      | 68     | 71.5       |  | 53.0    | 50.0    | 51.5       |
| 3                        | 93      | 99     | 96.0       |  | 89.0    | 81.0    | 85.0       |
| 4                        | 79      | 86     | 82.5       |  | 67.0    | 76.0    | 71.5       |
| 5                        | 76      | 75     | 75.5       |  | 65.0    | 70.0    | 67.5       |
| 6                        | 69      | 57     | 63.0       |  | 45.0    | 50.0    | 47.5       |
| 7                        | 95      | 94     | 94.5       |  | 51.0    | 55.0    | 53.0       |
| 8                        | 92      | 99     | 95.5       |  | 47.0    | 50.0    | 48.5       |
| 9                        | 63      | 79     | 71.0       |  | 56.0    | 68.0    | 62.0       |
| 10                       | 64      | 54     | 59.0       |  | 55.0    | 52.0    | 53.5       |
| mean                     |         |        | 79.35      |  |         |         | 59.45      |
| sem                      |         |        | 3.78333333 |  |         |         | 3.21333333 |
| 1                        |         |        |            |  |         |         |            |
| <b>asthma</b>            |         |        | RV         |  |         |         | OM 10      |
| 1                        | 91      | 96     | 93.5       |  | 44.0    | 52.0    | 48.0       |
| 2                        | 88      | 83     | 85.5       |  | 35.0    | 28.0    | 31.5       |
| 3                        | 66      | 79     | 72.5       |  | 64.0    | 57.0    | 60.5       |
| 4                        | 60      | 65     | 62.5       |  | 45.0    | 40.0    | 42.5       |
| 5                        | 70      | 78     | 74.0       |  | 31.0    | 34.0    | 32.5       |
| 6                        | 69      | 82     | 75.5       |  | 47.0    | 45.0    | 46.0       |
| 7                        | 67      | 60     | 63.5       |  | 56.0    | 57.0    | 56.5       |
| 8                        | 56      | 49     | 52.5       |  | 39.0    | 48.0    | 43.5       |
| 9                        | 54      | 56     | 55.0       |  | 48.0    | 53.0    | 50.5       |
| 10                       | 89      | 80     | 84.5       |  | 54.0    | 45.0    | 49.5       |
| mean                     |         |        | 71.9       |  |         |         | 46.1       |
| sem                      |         |        | 3.60666667 |  |         |         | 2.3        |
| 1                        |         |        |            |  |         |         |            |
| <b>COPD</b>              |         |        | RV         |  |         |         | OM 10      |
| 1                        | 89      | 84     | 86.5       |  | 66.0    | 63.0    | 66.0       |
| 2                        | 54      | 56     | 55.0       |  | 47.0    | 56.0    | 47.0       |
| 3                        | 78      | 71     | 74.5       |  | 55.0    | 52.0    | 55.0       |
| 4                        | 85      | 76     | 80.5       |  | 66.0    | 71.0    | 66.0       |
| 5                        | 81      | 85     | 83.0       |  | 54.0    | 63.0    | 54.0       |
| 6                        | 64      | 65     | 64.5       |  | 42.0    | 44.0    | 42.0       |
| 7                        | 86      | 71     | 78.5       |  | 30.0    | 33.0    | 30.0       |
| 8                        | 80      | 86     | 83.0       |  | 59.0    | 68.0    | 59.0       |
| mean                     |         |        | 75.6875    |  |         |         | 52.375     |
| sem                      |         |        | 3.1241126  |  |         |         | 3.60247388 |

**Figure 3:** Epithelial cell survival was manually counted in a modified Neugebauer chamber slide, after trypsin treatment and single cell suspension.

| dead cells (%) | RV       |          |          |          | OM 0.1  |          |          |          |         |
|----------------|----------|----------|----------|----------|---------|----------|----------|----------|---------|
|                | day      | Counts   |          |          |         | day      |          |          |         |
| control        | 1        | 2        | 3        | 4        | control | 1        | 2        | 3        |         |
| c1             | 67       | 59       | 53       | 37       | c1      | 68       | 53       | 48       | 3       |
| c2             | 73       | 62       | 47       | 26       | c2      | 69       | 57       | 44       | 2       |
| c3             | 59       | 55       | 41       | 31       | c3      | 54       | 58       | 35       | 4       |
| c4             | 64       | 51       | 66       | 38       | c4      | 55       | 46       | 34       | 2       |
| c5             | 58       | 49       | 44       | 42       | c5      | 76       | 59       | 48       | 3       |
| c6             | 69       | 67       | 37       | 29       | c6      | 83       | 73       | 48       | 4       |
| c7             | 61       | 54       | 49       | 37       | c7      | 45       | 50       | 31       | 3       |
| c8             | 58       | 63       | 44       | 28       | c8      | 61       | 58       | 41       | 3       |
| c9             | 75       | 35       | 21       | 0        | c9      | 59       | 52       | 27       | 3       |
| c10            | 64       | 59       | 30       | 19       | c10     | 62       | 65       | 43       | 3       |
| mean           | 64.8     | 55.4     | 43.2     | 28.7     | mean    | 63.2     | 57.1     | 39.9     | 3       |
| sem            | 1.931033 | 2.868217 | 3.909533 | 3.847221 | sem     | 3.527038 | 2.442449 | 2.424184 | 2.21610 |
| asthma         | 1        | 2        | 3        | 4        | asthma  | 1        | 2        | 3        |         |
| a1             | 65       | 43       | 52       | 38       | a1      | 64       | 62       | 41       | 2       |
| a2             | 58       | 59       | 41       | 32       | a2      | 47       | 69       | 41       | 3       |
| a3             | 64       | 61       | 53       | 29       | a3      | 58       | 57       | 31       | 2       |
| a4             | 61       | 74       | 38       | 21       | a4      | 64       | 63       | 54       | 3       |
| a5             | 59       | 48       | 32       | 14       | a5      | 59       | 47       | 41       | 4       |
| a6             | 47       | 44       | 32       | 25       | a6      | 51       | 43       | 38       | 2       |
| a7             | 49       | 47       | 41       | 27       | a7      | 69       | 58       | 49       | 4       |
| a8             | 53       | 43       | 28       | 31       | a8      | 63       | 61       | 46       | 2       |
| a9             | 51       | 48       | 32       | 31       | a9      | 60       | 55       | 42       | 2       |
| a10            | 57       | 55       | 47       | 41       | a10     | 74       | 75       | 69       | 7       |
| mean           | 56.4     | 52.2     | 39.6     | 28.9     | mean    | 60.9     | 59       | 45.2     | 37.     |
| sem            | 1.961859 | 3.172101 | 2.793644 | 2.474088 | sem     | 2.505328 | 2.992583 | 3.292416 | 4.70094 |
| COPD           |          |          |          |          |         |          |          |          |         |
| SM1            | 54       | 43       | 39       | 21       | SM1     | 64       | 58       | 42       | 2       |
| sm2            | 58       | 49       | 43       | 25       | sm2     | 62       | 61       | 58       | 4       |
| sm3            | 61       | 57       | 41       | 37       | sm3     | 59       | 52       | 46       | 3       |
| sm4            | 66       | 63       | 64       | 24       | sm4     | 63       | 49       | 44       | 2       |
| sm5            | 73       | 64       | 42       | 19       | sm5     | 74       | 63       | 52       | 3       |
| sm6            | 53       | 48       | 42       | 36       | sm6     | 51       | 42       | 33       | 1       |
| sm7            | 59       | 49       | 27       | 21       | sm7     | 67       | 63       | 54       | 2       |
| mean           | 60.57143 | 53.28571 | 42.57143 | 26.14286 | mean    | 62.85714 | 55.42857 | 47       | 3       |
| sem            | 2.212518 | 2.560692 | 3.458599 | 2.326862 | sem     | 2.231805 | 2.535463 | 2.664583 | 2.79284 |

|         | OM .5    |          |         |          |
|---------|----------|----------|---------|----------|
|         | day      |          |         |          |
| control | 1        | 2        | 3       | 4        |
| c1      | 56       | 58       | 53      | 42       |
| c2      | 74       | 63       | 55      | 39       |
| c3      | 59       | 51       | 54      | 38       |
| c4      | 63       | 48       | 44      | 23       |
| c5      | 55       | 51       | 47      | 31       |
| c6      | 76       | 71       | 68      | 63       |
| c7      | 63       | 59       | 45      | 32       |
| c8      | 86       | 76       | 71      | 54       |
| c9      | 76       | 53       | 41      | 17       |
| c10     | 61       | 57       | 36      | 26       |
| mean    | 66.9     | 58.7     | 51.4    | 36.5     |
| sem     | 3.281091 | 2.863758 | 3.56277 | 4.435338 |

|         | OM1      |          |          |         |
|---------|----------|----------|----------|---------|
|         | day      |          |          |         |
| control | 1        | 2        | 3        |         |
| c1      | 75       | 62       | 65       | 3       |
| c2      | 58       | 59       | 51       | 3       |
| c3      | 66       | 61       | 58       | 2       |
| c4      | 72       | 68       | 55       | 4       |
| c5      | 85       | 76       | 82       | 4       |
| c6      | 75       | 68       | 58       | 4       |
| c7      | 85       | 64       | 71       | 4       |
| c8      | 68       | 63       | 59       | 3       |
| c9      | 69       | 71       | 65       | 3       |
| c10     | 74       | 61       | 73       | 4       |
| mean    | 72.7     | 65.3     | 63.7     | 38.     |
| sem     | 2.607894 | 1.686877 | 2.985335 | 2.08593 |

| asthma | 1        | 2        | 3        | 4        |
|--------|----------|----------|----------|----------|
| a1     | 75       | 63       | 51       | 38       |
| a2     | 96       | 85       | 76       | 42       |
| a3     | 68       | 51       | 44       | 27       |
| a4     | 66       | 61       | 59       | 32       |
| a5     | 61       | 58       | 59       | 43       |
| a6     | 59       | 53       | 46       | 38       |
| a7     | 86       | 75       | 61       | 41       |
| a8     | 63       | 65       | 48       | 37       |
| a9     | 65       | 61       | 57       | 43       |
| a10    | 73       | 64       | 59       | 32       |
| mean   | 71.2     | 63.6     | 56       | 37.3     |
| sem    | 3.723201 | 3.173501 | 2.955221 | 1.713022 |

| asthma | 1        | 2        | 3        |         |
|--------|----------|----------|----------|---------|
| a1     | 69       | 58       | 45       | 2       |
| a2     | 79       | 66       | 53       | 4       |
| a3     | 85       | 75       | 82       | 6       |
| a4     | 79       | 76       | 64       | 3       |
| a5     | 74       | 64       | 54       | 2       |
| a6     | 62       | 54       | 38       | 2       |
| a7     | 75       | 71       | 74       | 6       |
| a8     | 88       | 69       | 73       | 5       |
| a9     | 79       | 68       | 52       | 2       |
| a10    | 85       | 74       | 66       | 5       |
| mean   | 77.5     | 67.5     | 60.1     | 4       |
| sem    | 2.495552 | 2.291288 | 4.420784 | 5.16612 |

| COPD |          |          |          |          |
|------|----------|----------|----------|----------|
| SM1  | 69       | 58       | 53       | 28       |
| sm2  | 73       | 51       | 49       | 32       |
| sm3  | 58       | 56       | 48       | 25       |
| sm4  | 73       | 65       | 58       | 33       |
| sm5  | 61       | 63       | 51       | 28       |
| sm6  | 66       | 63       | 65       | 31       |
| sm7  | 74       | 58       | 62       | 28       |
| mean | 67.71429 | 59.14286 | 55.14286 | 29.28571 |
| sem  | 1.997618 | 1.543033 | 2.093072 | 0.889087 |

| SM1  |          |          |          |         |
|------|----------|----------|----------|---------|
| SM1  | 74       | 76       | 64       | 3       |
| sm2  | 68       | 61       | 48       | 2       |
| sm3  | 71       | 64       | 41       | 1       |
| sm4  | 59       | 62       | 58       | 4       |
| sm5  | 77       | 73       | 65       | 3       |
| sm6  | 73       | 58       | 55       | 2       |
| sm7  | 74       | 68       | 68       | 5       |
| mean | 70.85714 | 66       | 57       | 33.1428 |
| sem  | 1.874643 | 2.089657 | 3.098387 | 4.04733 |

| OM10    |          |          |          |          |
|---------|----------|----------|----------|----------|
|         | day      |          |          |          |
|         | 1        | 2        | 3        | 4        |
| control |          |          |          |          |
| c1      | 79       | 74       | 75       | 42       |
| c2      | 86       | 84       | 75       | 36       |
| c3      | 89       | 95       | 91       | 66       |
| c4      | 75       | 64       | 69       | 48       |
| c5      | 97       | 85       | 69       | 43       |
| c6      | 83       | 79       | 84       | 39       |
| c7      | 68       | 71       | 65       | 52       |
| c8      | 79       | 75       | 83       | 48       |
| c9      | 94       | 97       | 64       | 61       |
| c10     | 89       | 59       | 53       | 36       |
| mean    | 83.9     | 78.3     | 72.8     | 47.1     |
| sem     | 2.810496 | 3.896009 | 3.542755 | 3.216105 |

| OM50    |          |          |          |         |
|---------|----------|----------|----------|---------|
|         | day      |          |          |         |
|         | 1        | 2        | 3        |         |
| control |          |          |          |         |
| c1      | 96       | 96       | 79       | 4       |
| c2      | 84       | 76       | 69       | 3       |
| c3      | 88       | 82       | 85       | 4       |
| c4      | 79       | 74       | 81       | 5       |
| c5      | 68       | 54       | 49       | 2       |
| c6      | 93       | 85       | 86       | 4       |
| c7      | 85       | 94       | 73       | 4       |
| c8      | 84       | 61       | 74       | 3       |
| c9      | 97       | 86       | 91       | 4       |
| c10     | 84       | 83       | 74       | 6       |
| mean    | 85.8     | 79.1     | 76.1     | 43.     |
| sem     | 2.707192 | 4.225452 | 3.704202 | 3.40408 |

| asthma |          |          |          |          |
|--------|----------|----------|----------|----------|
|        | 1        | 2        | 3        | 4        |
| a1     | 96       | 95       | 83       | 41       |
| a2     | 88       | 81       | 75       | 39       |
| a3     | 81       | 84       | 72       | 48       |
| a4     | 79       | 64       | 51       | 30       |
| a5     | 68       | 43       | 49       | 21       |
| a6     | 77       | 71       | 67       | 55       |
| a7     | 85       | 78       | 74       | 53       |
| a8     | 91       | 86       | 74       | 37       |
| a9     | 69       | 61       | 59       | 43       |
| a10    | 75       | 72       | 68       | 32       |
| mean   | 80.9     | 73.5     | 67.2     | 39.9     |
| sem    | 2.903829 | 4.702836 | 3.476269 | 3.338163 |

| asthma |          |          |          |         |
|--------|----------|----------|----------|---------|
|        | 1        | 2        | 3        |         |
| a1     | 86       | 78       | 73       | 2       |
| a2     | 89       | 74       | 61       | 4       |
| a3     | 85       | 85       | 53       | 3       |
| a4     | 79       | 63       | 61       | 2       |
| a5     | 83       | 74       | 71       | 4       |
| a6     | 96       | 88       | 75       | 3       |
| a7     | 74       | 71       | 69       | 5       |
| a8     | 79       | 64       | 61       | 3       |
| a9     | 88       | 85       | 81       | 7       |
| a10    | 93       | 87       | 74       | 4       |
| mean   | 85.2     | 76.9     | 67.9     | 41.     |
| sem    | 2.128119 | 2.922898 | 2.709859 | 4.59516 |

| COPD |          |          |          |          |
|------|----------|----------|----------|----------|
|      | 1        | 2        | 3        | 4        |
| SM1  | 88       | 80       | 65       | 34       |
| sm2  | 79       | 71       | 54       | 32       |
| sm3  | 95       | 86       | 75       | 54       |
| sm4  | 82       | 76       | 69       | 41       |
| sm5  | 58       | 74       | 53       | 47       |
| sm6  | 87       | 89       | 74       | 34       |
| sm7  | 81       | 65       | 73       | 49       |
| mean | 81.42857 | 77.28571 | 66.14286 | 41.57143 |
| sem  | 3.682649 | 2.656528 | 2.93501  | 2.725541 |

| COPD |          |          |          |         |
|------|----------|----------|----------|---------|
|      | 1        | 2        | 3        |         |
| SM1  | 86       | 76       | 63       | 2       |
| sm2  | 97       | 93       | 76       | 5       |
| sm3  | 93       | 70       | 83       | 3       |
| sm4  | 69       | 74       | 63       | 5       |
| sm5  | 85       | 74       | 61       | 3       |
| sm6  | 96       | 58       | 66       | 4       |
| sm7  | 93       | 86       | 69       | 2       |
| mean | 88.42857 | 75.85714 | 68.71429 | 40.1428 |
| sem  | 3.076021 | 3.55166  | 2.547641 | 3.44203 |

**Figure 4:** Signal transduction of RV and OM-85.

**4.A: intra cellular Erk ½ MAPK expression (optical density) in minutes (T=minutes) after addition of compounds. Statistics were calculated as**

| total Erk | 0'         | 15'        | 30'        | 60'        |
|-----------|------------|------------|------------|------------|
| a         | 100596     | 116543     | 110694     | 103725     |
| b         | 118475     | 109687     | 110583     | 115342     |
| c         | 109485     | 110682     | 128574     | 108275     |
| d         | 142356     | 132534     | 128574     | 119857     |
| mean      | 117728     | 117361.5   | 119606.25  | 111799.75  |
| sem       | 7325.13154 | 4379.92348 | 5177.53288 | 3348.48722 |

| phos Erk | 0'         | 15'        | 30'        | 60'        |
|----------|------------|------------|------------|------------|
| a        | 86758      | 124138     | 143265     | 156325     |
| b        | 99706      | 132436     | 154326     | 117482     |
| c        | 76850      | 176574     | 253418     | 198675     |
| d        | 99685      | 142367     | 276453     | 228563     |
| meam     | 90749.75   | 143878.75  | 206865.5   | 175261.25  |
| sem      | 5164.83117 | 9438.30569 | 33526.7301 | 22145.8573 |

| ratio<br>phos/total<br>Erk | 0'          | 15'        | 30'        | 60'        |
|----------------------------|-------------|------------|------------|------------|
| a                          | 0.862439858 | 1.06516908 | 1.29424359 | 1.50711015 |
| b                          | 0.841578392 | 1.20739924 | 1.39556713 | 1.01855352 |
| c                          | 0.701922638 | 1.59532715 | 1.97098947 | 1.83491111 |
| d                          | 0.700251482 | 1.07419228 | 2.150147   | 1.90696413 |
| mean                       | 0.776548093 | 1.23552194 | 1.7027368  | 1.56688473 |
| sem                        | 0.043567448 | 0.10386682 | 0.20659408 | 0.17554502 |

**4.B: intra cellular cAMP levels (pg/ml) in minutes (T=minutes) after addition of compounds.**

**A=asthma; C=COPD; H=healthy**

| Cell lines |      | OM 10µg/ml |         |        |        |
|------------|------|------------|---------|--------|--------|
|            |      | T0         | T15     | T30    | T60    |
| asthma     | A1   | 0.942      | 38.942  | 12.458 | 2.791  |
|            | A2   | 0.897      | 93.085  | 22.714 | 21.621 |
|            | A3   | 0.947      | 54.858  | 41.679 | 2.341  |
|            | mean | 0.929      | 62.295  | 25.617 | 8.918  |
| COPD       | C1   | 0.602      | 193.359 | 19.474 | 6.164  |
|            | C2   | 0.615      | 14.01   | 5.2715 | 16.487 |
|            | C3   | 0.704      | 5.973   | 38.202 | 0.859  |
|            | C4   | 0.642      | 58.485  | 72.606 | 0.999  |
|            | mean | 0.641      | 67.957  | 33.888 | 6.127  |

|         |      |        |         |          |        |
|---------|------|--------|---------|----------|--------|
| healthy | H1   | 2.916  | 45.801  | 47.21    | 1.233  |
|         | H2   | 1.172  | 49.94   | 90.84    | 1.593  |
|         | H3   | 1.176  | 95.993  | 158.76   | 1.447  |
|         | mean | 1.755  | 63.911  | 98.937   | 1.424  |
| ALL     | MEAN | 1.0613 | 65.0446 | 50.92145 | 5.5535 |

#### 4.C Expression of total and phosphorylated CREB by western-blotting (optical density)

| total CREB | 0'         | 15'        | 30'        | 60'        |
|------------|------------|------------|------------|------------|
| a          | 116253     | 109584     | 113256     | 116453     |
| b          | 119865     | 116254     | 128475     | 129834     |
| c          | 128475     | 127594     | 123847     | 128274     |
| d          | 97856      | 132860     | 110968     | 94564      |
| mean       | 115612.25  | 121573     | 119136.5   | 117281.25  |
| sem        | 5125.78786 | 4996.38923 | 4055.59697 | 6797.00038 |

| phos Creb | 0'        | 15'        | 30'        | 60'       |
|-----------|-----------|------------|------------|-----------|
| a         | 65746     | 112635     | 119856     | 97865     |
| b         | 59483     | 110293     | 109567     | 109485    |
| c         | 77512     | 101928     | 143527     | 96857     |
| d         | 110293    | 123957     | 132437     | 100968    |
| mean      | 78258.5   | 112203.25  | 126346.75  | 101293.75 |
| sem       | 9247.5636 | 3517.65085 | 6717.61472 | 2364.6102 |

| ratio<br>phos/total<br>Creb | 0'         | 15'        | 30'        | 60'        |
|-----------------------------|------------|------------|------------|------------|
| a                           | 0.56554239 | 1.02784166 | 1.05827506 | 0.84038196 |
| b                           | 0.49624995 | 0.94872434 | 0.8528274  | 0.8432691  |
| c                           | 0.6033236  | 0.79884634 | 1.15890575 | 0.75507897 |
| d                           | 1.12709491 | 0.93298961 | 1.19347019 | 1.06772133 |
| mean                        | 0.69805272 | 0.92710049 | 1.0658696  | 0.87661284 |
| sem                         | 0.12385381 | 0.03702378 | 0.06369234 | 0.05516827 |

#### 4.D: Effect of signal inhibition on RV replication as described in figure 2.

|      | untreated | RV   | RV+DDA (10 uM) | RV + PD98059 | RV + SB203580 | RV + OM-85 |
|------|-----------|------|----------------|--------------|---------------|------------|
| E1   | 0         | 95   | 95             | 74           | 69            | 43         |
| E2   | 0         | 52   | 86             | 72           | 85            | 25         |
| E3   | 0         | 85   | 63             | 69           | 93            | 51         |
| E4   | 0         | 63   | 76             | 72           | 91            | 37         |
| E5   | 0         | 78   | 49             | 55           | 76            | 48         |
| mean | 0         | 74.6 | 73.8           | 68.4         | 82.8          | 40.8       |
| sem  | 0         | 6.84 | 7.12           | 2.68         | 4.12          | 3.92       |

**Figure 5: Role of CqR1 and  $\beta$ -defensin in RV and OM-85 signalling assessed by western-blot densitometry.**

**A. C1qR expression determined by Western-blotting (optical density)**

|         | day 0    | RV day 2 | OM 10<br>ug/ml | RV + OM<br>10 ug |
|---------|----------|----------|----------------|------------------|
| control |          |          |                |                  |
| c1      | 1.098    | 1.132    | 2.657          | 2.473            |
| c2      | 0.905    | 1.218    | 2.186          | 2.196            |
| c3      | 1.125    | 0.968    | 1.978          | 1.978            |
| mean    | 1.042667 | 1.106    | 2.273667       | 2.215667         |
| sem     | 0.069273 | 0.07333  | 0.200852       | 0.143232         |
| asthma  |          |          |                |                  |
| a1      | 1.165    | 0.978    | 1.978          | 2.318            |
| a2      | 1.121    | 1.263    | 2.687          | 2.456            |
| a3      | 0.867    | 1.177    | 1.994          | 1.978            |
| mean    | 1.051    | 1.139333 | 2.219667       | 2.250667         |
| sem     | 0.092873 | 0.084401 | 0.233712       | 0.142034         |
| COPD    |          |          |                |                  |
| sm1     | 1.005    | 0.978    | 2.756          | 2.758            |
| sm2     | 0.954    | 0.894    | 2.186          | 1.473            |
| sm3     | 1.102    | 1.123    | 2.574          | 2.175            |
| mean    | 1.020333 | 0.998333 | 2.505333       | 2.135333         |
| sem     | 0.043406 | 0.066884 | 0.168089       | 0.371477         |

**B. Signalling control of C1qR expression determined by Western-blotting (optical density)**

| Cell lines | Control    | OM-85      | OM+DDA     | OM+SB      | OM+PD      |
|------------|------------|------------|------------|------------|------------|
| H01        | 0.783      | 1.251      | 0.824      | 1.159      | 0.686      |
| H02        | 0.736      | 1.152      | 0.663      | 1.143      | 0.632      |
| H03        | 0.718      | 0.834      | 0.652      | 0.997      | 0.569      |
| H04        | 0.476      | 1.135      | 0.345      | 0.75       | 0.742      |
| H05        | 0.327      | 0.718      | 0.516      | 1.155      | 0.506      |
| H06        | 0.686      | 1.282      | 0.418      | 0.737      | 0.553      |
| mean       | 0.62       | 1.06       | 0.57       | 0.99       | 0.61       |
| SD         | 0.18       | 0.23       | 0.18       | 0.20       | 0.09       |
| SEM        | 0.08014088 | 0.10351232 | 0.07912859 | 0.08963322 | 0.03964812 |

**C  $\beta$ -defensin expression determined by western-blotting (optical density)**

| defensin beta |       | OM 10    |       | RV + OM 10 ug |       | OM 10    |       | RV |
|---------------|-------|----------|-------|---------------|-------|----------|-------|----|
| control       | day 0 | RV day 2 | ug/ml | control       | day 0 | RV day 2 | ug/ml | ug |
| control       |       |          |       | control       |       |          |       |    |

|      |        |        |        |        |      |       |       |       |
|------|--------|--------|--------|--------|------|-------|-------|-------|
| h1   | 95598  | 122330 | 308586 | 317304 | h1   | 0.897 | 1.147 | 2.895 |
| h2   | 108867 | 103443 | 191196 | 169790 | h2   | 1.021 | 0.970 | 1.793 |
| h3   | 108383 | 113613 | 219187 | 266938 | h3   | 1.017 | 1.066 | 2.056 |
| h4   | 124074 | 118069 | 308586 | 293293 | h4   | 1.164 | 1.108 | 2.895 |
| h5   | 95598  | 97438  | 212698 | 308586 | h5   | 0.897 | 0.914 | 1.995 |
| h6   | 107124 | 128529 | 179476 | 257349 | h6   | 1.005 | 1.206 | 1.684 |
| mean | 106607 |        |        |        | mean | 1.000 | 1.068 | 2.220 |
|      |        |        |        |        | sem  | 0.057 | 0.063 | 0.312 |

|        |        |        |        |        |        |       |       |       |
|--------|--------|--------|--------|--------|--------|-------|-------|-------|
| asthma |        |        |        |        | asthma |       |       |       |
| a1     | 99412  | 167211 | 223219 | 235620 | a1     | 0.933 | 1.568 | 2.094 |
| a2     | 119436 | 118318 | 290408 | 335133 | a2     | 1.120 | 1.110 | 2.724 |
| a3     | 129500 | 102258 | 323851 | 223321 | a3     | 1.215 | 0.959 | 3.038 |
| a4     | 121673 | 128483 | 312974 | 270079 | a4     | 1.141 | 1.205 | 2.936 |
| a5     | 110186 | 101241 | 222203 | 139461 | a5     | 1.034 | 0.950 | 2.084 |
| a6     | 100936 | 176461 | 291425 | 249647 | a6     | 0.947 | 1.655 | 2.734 |
| a7     | 129601 | 136412 | 261642 | 201060 | a7     | 1.216 | 1.280 | 2.454 |
| mean   | 115821 |        |        |        | mean   | 1.086 | 1.247 | 2.581 |
|        |        |        |        |        | sem    | 0.068 | 0.160 | 0.221 |

|      |        |        |        |        |      |       |       |       |
|------|--------|--------|--------|--------|------|-------|-------|-------|
| COPD |        |        |        |        | COPD |       |       |       |
| c1   | 125825 | 154913 | 325385 | 310728 | c1   | 1.180 | 1.453 | 3.052 |
| c2   | 137212 | 105756 | 245335 | 309826 | c2   | 1.287 | 0.992 | 2.301 |
| c3   | 109138 | 112295 | 185693 | 165962 | c3   | 1.024 | 1.053 | 1.742 |
| c4   | 94368  | 132589 | 220869 | 225041 | c4   | 0.885 | 1.244 | 2.072 |
| c5   | 154688 | 136535 | 206663 | 292914 | c5   | 1.451 | 1.281 | 1.939 |
| c6   | 112408 | 178590 | 357969 | 257625 | c6   | 1.054 | 1.675 | 3.358 |
| c7   | 162692 | 149727 | 247703 | 360449 | c7   | 1.526 | 1.404 | 2.324 |
| c8   | 110942 | 207114 | 223012 | 356728 | c8   | 1.041 | 1.943 | 2.092 |
| mean | 125909 |        |        |        | mean | 1.181 | 1.381 | 2.360 |
|      |        |        |        |        | sem  | 0.129 | 0.182 | 0.323 |

#### D Signalling control $\beta$ -defensin expression determined by western-blotting (optical density)

| Cell lines | Control    | OM         | OM+DDA     | OM+SB      | OM+PD      |
|------------|------------|------------|------------|------------|------------|
| H01        | 0.4        | 0.595      | 0.755      | 0.548      | 0.5        |
| H02        | 0.424      | 0.839      | 0.481      | 0.757      | 0.486      |
| H03        | 0.218      | 0.602      | 0.789      | 0.557      | 0.417      |
| H04        | 0.434      | 0.601      | 0.492      | 0.532      | 0.465      |
| H05        | 0.254      | 0.499      | 0.416      | 0.453      | 0.335      |
| H06        | 0.434      | 0.549      | 0.3        | 0.509      | 0.477      |
| mean       | 0.36       | 0.61       | 0.54       | 0.56       | 0.45       |
| SD         | 0.10       | 0.12       | 0.19       | 0.10       | 0.06       |
| SEM        | 0.16129504 | 0.27466368 | 0.24097359 | 0.25014147 | 0.19975541 |

**Figure 6: The effect of OM-85 and RV infection on Icam, INF- $\gamma$  and Myd88 expression.**

**A. ICAM expression was detected by Western-blotting (optical density)**

| Icam 1  |          |          |             |               | RV      |          |          |             |       |
|---------|----------|----------|-------------|---------------|---------|----------|----------|-------------|-------|
| control | day 0    | RV day 2 | OM 10 ug/ml | RV + OM 10 ug | control | day 0    | RV day 2 | OM 10 ug/ml | RV ug |
| control |          |          |             |               | control |          |          |             |       |
| h1      | 184297   | 657495   | 160143      | 352424        | h1      | 1.125258 | 4.014458 | 0.977783    |       |
| h2      | 183304   | 534258   | 145419      | 214231        | h2      | 1.119198 | 3.262011 | 0.887883    |       |
| h3      | 160143   | 382758   | 243689      | 319285        | h3      | 0.977783 | 2.337    | 1.487887    |       |
| h4      | 128374   | 490852   | 268835      | 474308        | h4      | 0.783811 | 2.996985 | 1.641423    |       |
| h5      | 166430   | 315243   | 117564      | 201764        | h5      | 1.016167 | 1.924775 | 0.717809    |       |
| h6      | 160143   | 553452   | 164444      | 775072        | h6      | 0.977783 | 3.379204 | 1.004046    |       |
| mean    | 163781.8 |          |             |               | mean    | 1        | 2.985739 | 1.119472    |       |
|         |          |          |             |               | sem     | 0.072057 | 0.434821 | 0.209209    |       |
| asthma  |          |          |             |               | asthma  |          |          |             |       |
| a1      | 139351   | 832819   | 159710      | 277691        | a1      | 0.850835 | 5.084934 | 0.97514     |       |
| a2      | 127465   | 584719   | 236088      | 415904        | a2      | 0.778259 | 3.570108 | 1.441478    |       |
| a3      | 118613   | 375313   | 276426      | 402879        | a3      | 0.724213 | 2.29154  | 1.687772    |       |
| a4      | 125315   | 275162   | 125947      | 161228        | a4      | 0.765133 | 1.680051 | 0.768994    |       |
| a5      | 148582   | 395419   | 160975      | 236341        | a5      | 0.907197 | 2.414301 | 0.982861    |       |
| a6      | 167930   | 388084   | 312971      | 276426        | a6      | 1.025325 | 2.36952  | 1.910904    |       |
| a7      | 126959   | 859627   | 123671      | 554496        | a7      | 0.775171 | 5.248615 | 0.755096    |       |
| mean    | 136316.3 |          |             |               | mean    | 0.832305 | 3.23701  | 1.217463    |       |
|         |          |          |             |               | sem     | 0.060365 | 0.827303 | 0.26676     |       |
| COPD    |          |          |             |               | COPD    |          |          |             |       |
| c1      | 217264   | 663520   | 95553       | 447612        | c1      | 1.326546 | 4.051244 | 0.583417    |       |
| c2      | 129679   | 446390   | 165333      | 325573        | c2      | 0.791781 | 2.725517 | 1.009474    |       |
| c3      | 228347   | 558548   | 101462      | 223704        | c3      | 1.394215 | 3.410317 | 0.619492    |       |
| c4      | 298674   | 334742   | 227164      | 312645        | c4      | 1.823609 | 2.043826 | 1.386992    |       |
| c5      | 134875   | 223806   | 124178      | 142537        | c5      | 0.823502 | 1.36649  | 0.758194    |       |
| c6      | 119594   | 335264   | 222686      | 285764        | c6      | 0.730205 | 2.047016 | 1.359648    |       |
| c7      | 266453   | 671928   | 129781      | 221667        | c7      | 1.626878 | 4.10258  | 0.792403    |       |
| c8      | 96572    | 355013   | 137727      | 314253        | c8      | 0.589637 | 2.167601 | 0.840917    |       |
| mean    | 186432   |          |             |               | mean    | 1.138297 | 2.739324 | 0.918817    |       |
|         |          |          |             |               | sd      | 0.462298 | 1.014507 | 0.309764    |       |
|         |          |          |             |               | sem     | 0.266908 | 0.585726 | 0.178842    |       |

**B. He role of intracellular signalling on ICAM expression**

| Cell lines | Control | RV+   |       | RV+    |       | RV+   |  |
|------------|---------|-------|-------|--------|-------|-------|--|
|            |         | RV    | OM    | OM+DDA | OM+SB | OM+PD |  |
| H01        | 1.174   | 4.386 | 2.968 | 4.233  | 1.978 | 3.879 |  |
| H02        | 0.886   | 3.975 | 3.175 | 3.996  | 2.735 | 4.285 |  |
| H03        | 1.047   | 4.823 | 3.867 | 4.175  | 2.186 | 3.576 |  |

|      |            |            |           |            |            |            |
|------|------------|------------|-----------|------------|------------|------------|
| H04  | 0.978      | 3.968      | 1.685     | 2.286      | 3.296      | 3.773      |
| H05  | 0.737      | 2.175      | 1.953     | 3.004      | 3.191      | 2.396      |
| H06  | 1.006      | 4.396      | 2.504     | 4.867      | 2.968      | 3.818      |
| mean | 0.97       | 3.95       | 2.69      | 3.76       | 2.73       | 3.62       |
| SEM  | 0.06640462 | 0.41485548 | 0.3625247 | 0.42053827 | 0.28789045 | 0.28789045 |

**C. Interferon- $\gamma$  (pg/ml/24 hours) determined by ELISA**

Date/Time 08/29/2017 07:39:35

Quadratic Fit:  $Y=A+BX+CX^2$

20/50/80%:  $X = 99.458 / 279.762 / 529.291$   $Y = 0.476 / 1.111 / 1.746$

A: 0.063 (+/-0.033), B: 0.004 (+/-0.000), C: -0.000 (+/-0.000)

chi2=0.060, RMS=0.074, r^2=0.992

Standards Report:

| Std # | Conc | Well   | Replicates | Mean  | SD    | %CV    |
|-------|------|--------|------------|-------|-------|--------|
| 1     |      | 15 G2  | 0.049      | 0.053 | 0.006 | 10.673 |
|       |      | H2     | 0.057      |       |       |        |
| 2     |      | 31 E2  | 0.21       | 0.2   | 0.013 | 6.701  |
|       |      | F2     | 0.191      |       |       |        |
| 3     |      | 62 C2  | 0.472      | 0.464 | 0.011 | 2.438  |
|       |      | D2     | 0.456      |       |       |        |
| 4     |      | 125 A2 | 0.528      | 0.538 | 0.013 | 2.5    |
|       |      | B2     | 0.547      |       |       |        |
| 5     |      | 250 G1 | 0.96       | 0.962 | 0.002 | 0.221  |
|       |      | H1     | 0.963      |       |       |        |
| 6     |      | 500 E1 | 1.738      | 1.716 | 0.031 | 1.813  |
|       |      | F1     | 1.694      |       |       |        |
| 7     | 1000 | C1     | 2.174      | 2.17  | 0.006 | 0.293  |

Sample Report:

| Sample ID | Well | Replicates | Mean     | Conc          |
|-----------|------|------------|----------|---------------|
| A1-C      | E9   | 0.066      | 0.066    | 0.728 ( * )   |
| A1-OM     | G9   | 0.384      | 0.384    | 76.291 ( * )  |
| A1-RV     | F9   | 0.193      | 0.193    | 30.172 ( * )  |
| A1-RV-OM  | H9   | 0.539      | 0.539    | 115.557 ( * ) |
| A2-RV-OM  | D10  | 0.417      | 0.417    | 84.504 ( * )  |
| A2-C      | A10  | 0.06       | 0.06 (-) | ( * )         |
| A2-OM     | C10  | 0.101      | 0.101    | 8.752 ( * )   |
| A2-RV     | B10  | 0.108      | 0.108    | 10.365 ( * )  |
| A3-C      | E10  | 0.081      | 0.081    | 4.159 ( * )   |
| A3-OM     | G10  | 0.088      | 0.088    | 5.764 ( * )   |
| A3-RV     | F10  | 0.145      | 0.145    | 18.936 ( * )  |
| A3-RV-OM  | H10  | 0.477      | 0.477    | 99.636 ( * )  |
| A4-C      | A11  | 0.03       | 0.03 (-) | ( * )         |
| A4-OM     | C11  | 0.273      | 0.273    | 49.206 ( * )  |
| A4-RV     | B11  | 0.085      | 0.085    | 5.076 ( * )   |
| A4-RV-OM  | D11  | 0.298      | 0.298    | 55.236 ( * )  |

|          |     |       |             |               |
|----------|-----|-------|-------------|---------------|
| A5-C     | E11 | 0.175 | 0.175       | 25.943 ( * )  |
| A5-OM    | G11 | 0.374 | 0.374       | 73.817 ( * )  |
| A5-RV    | F11 | 0.188 | 0.188       | 28.995 ( * )  |
| A5-RV-OM | H11 | 0.485 | 0.485       | 101.674 ( * ) |
| A6-C     | A12 | 0.04  | 0.04 ( - )  | ( * )         |
| A6-OM    | C12 | 0.109 | 0.109       | 10.596 ( * )  |
| A6-RV    | B12 | 0.078 | 0.078       | 3.472 ( * )   |
| A6-RV-OM | D12 | 0.278 | 0.278       | 50.409 ( * )  |
| A7-C     | E12 | 0.094 | 0.094       | 7.142 ( * )   |
| A7-OM    | G12 | 0.189 | 0.189       | 29.231 ( * )  |
| A7-RV    | F12 | 0.211 | 0.211       | 34.421 ( * )  |
| A7-RV-OM | H12 | 0.526 | 0.526       | 112.194 ( * ) |
| C1-C     | A6  | 0.027 | 0.027 ( - ) | ( * )         |
| C1-OM    | C6  | 0.094 | 0.094       | 7.142 ( * )   |
| C1-RV    | B6  | 0.078 | 0.078       | 3.472 ( * )   |
| C1-RV-OM | D6  | 0.311 | 0.311       | 58.387 ( * )  |
| C2-C     | E6  | 0.029 | 0.029 ( - ) | ( * )         |
| C2-OM    | G6  | 0.211 | 0.211       | 34.421 ( * )  |
| C2-RV    | F6  | 0.069 | 0.069       | 1.413 ( * )   |
| C2-RV-OM | H6  | 0.738 | 0.738       | 168.806 ( * ) |
| C3-C     | A7  | 0.316 | 0.316       | 59.602 ( * )  |
| C3-OM    | C7  | 0.177 | 0.177       | 26.412 ( * )  |
| C3-RV    | B7  | 0.166 | 0.166       | 23.835 ( * )  |
| C3-RV-OM | D7  | 0.738 | 0.738       | 168.806 ( * ) |
| C4-C     | E7  | 0.118 | 0.118       | 12.674 ( * )  |
| C4-OM    | G7  | 0.145 | 0.145       | 18.936 ( * )  |
| C4-RV    | F7  | 0.167 | 0.167       | 24.069 ( * )  |
| C4-RV-OM | H7  | 0.434 | 0.434       | 88.765 ( * )  |
| C5-C     | A8  | 0.263 | 0.263       | 46.805 ( * )  |
| C5-OM    | C8  | 0.383 | 0.383       | 76.043 ( * )  |
| C5-RV    | B8  | 0.288 | 0.288       | 52.819 ( * )  |
| C5-RV-OM | D8  | 0.998 | 0.998       | 244.287 ( * ) |
| C6-C     | E8  | 0.077 | 0.077       | 3.243 ( * )   |
| C6-OM    | G8  | 0.176 | 0.176       | 26.177 ( * )  |
| C6-RV    | F8  | 0.041 | 0.041 ( - ) | ( * )         |
| C6-RV-OM | H8  | 0.384 | 0.384       | 76.291 ( * )  |
| C7-C     | A9  | 0.188 | 0.188       | 28.995 ( * )  |
| C7-OM    | C9  | 0.263 | 0.263       | 46.805 ( * )  |
| C7-RV    | B9  | 0.094 | 0.094       | 7.142 ( * )   |
| C7-RV-OM | D9  | 0.665 | 0.665       | 148.868 ( * ) |
| H1-C     | A3  | 0.039 | 0.039 ( - ) | ( * )         |
| H1-OM    | C3  | 0.184 | 0.184       | 28.055 ( * )  |
| H1-OM-RV | D3  | 0.637 | 0.637       | 141.349 ( * ) |
| H1-RV    | B3  | 0.176 | 0.176       | 26.177 ( * )  |
| H2-C     | E3  | 0.059 | 0.059 ( - ) | ( * )         |
| H2-OM    | G3  | 0.265 | 0.265       | 47.285 ( * )  |
| H2-RV    | F3  | 0.095 | 0.095       | 7.372 ( * )   |

|          |    |       |             |               |
|----------|----|-------|-------------|---------------|
| H2-RV-OM | H3 | 0.639 | 0.639       | 141.884 ( * ) |
| H3-C     | A4 | 0.051 | 0.051 ( - ) | ( * )         |
| H3-OM    | C4 | 0.364 | 0.364       | 71.35 ( * )   |
| H3-RV    | B4 | 0.202 | 0.202       | 32.294 ( * )  |
| H3-RV-OM | D4 | 0.738 | 0.738       | 168.806 ( * ) |
| H4-C     | E4 | 0.105 | 0.105       | 9.673 ( * )   |
| H4-OM    | G4 | 0.189 | 0.189       | 29.231 ( * )  |
| H4-RV    | F4 | 0.208 | 0.208       | 33.711 ( * )  |
| H4-RV-OM | H4 | 0.531 | 0.531       | 113.486 ( * ) |
| H5-C     | A5 | 0.045 | 0.045 ( - ) | ( * )         |
| H5-OM    | C5 | 0.134 | 0.134       | 16.38 ( * )   |
| H5-RV    | B5 | 0.057 | 0.057 ( - ) | ( * )         |
| H5-RV-OM | D5 | 0.656 | 0.656       | 146.444 ( * ) |
| H6-C     | E5 | 0.089 | 0.089       | 5.993 ( * )   |
| H6-OM    | G5 | 0.374 | 0.374       | 73.817 ( * )  |
| H6-RV    | F5 | 0.134 | 0.134       | 16.38 ( * )   |
| H6-RV-OM | H5 | 0.407 | 0.407       | 82.007 ( * )  |

Analysis:

| Healthy | untreated | RV         | OM        | RV+OM      |
|---------|-----------|------------|-----------|------------|
| H1      | 0         | 26.177     | 28.055    | 141.349    |
| H2      | 0         | 7.372      | 47.285    | 141.884    |
| H3      | 0         | 32.294     | 71.35     | 168.806    |
| H4      | 9.673     | 33.711     | 29.231    | 113.486    |
| H5      | 0         | 0          | 16.38     | 146.444    |
| H6      | 5.993     | 16.38      | 73.817    | 82.007     |
| Mean    | 2.611     | 19.3223333 | 44.353    | 132.329333 |
| SEM     | 1.8823289 | 6.15501317 | 10.737505 | 13.5496502 |

| Asthma | untreated  | RV         | OM         | RV+OM      |
|--------|------------|------------|------------|------------|
| A1     | 0.728      | 30.172     | 76.291     | 115.557    |
| A2     | 0          | 10.365     | 8.752      | 84.504     |
| A3     | 4.159      | 18.936     | 5.764      | 99.636     |
| A4     | 0          | 5.076      | 49.206     | 55.236     |
| A5     | 25.943     | 28.995     | 73.817     | 101.674    |
| A6     | 0          | 3.472      | 10.596     | 50.409     |
| A7     | 7.143      | 24.421     | 29.231     | 112.194    |
| Mean   | 5.42471429 | 17.3481429 | 36.2367143 | 88.4585714 |
| SEM    | 3.85823897 | 4.54778428 | 12.444709  | 10.7553935 |

| COPD | untreated | RV     | OM     | RV+OM   |
|------|-----------|--------|--------|---------|
| C1   | 0         | 3.472  | 7.142  | 58.387  |
| C2   | 0         | 1.413  | 34.421 | 168.806 |
| C3   | 59.6.2    | 23.835 | 26.412 | 168.806 |
| C4   | 12.674    | 24.069 | 18.936 | 88.765  |
| C5   | 46.805    | 52.819 | 76.043 | 244.287 |

|      |            |            |            |            |
|------|------------|------------|------------|------------|
| C6   | 3.243      | 0          | 26.177     | 76.291     |
| C7   | 28.995     | 7.142      | 46.805     | 148.868    |
| Mean | 15.2861667 | 16.1071429 | 33.7051429 | 136.315714 |
| SEM  | 7.74718019 | 7.79289189 | 9.12597615 | 26.8035637 |

**D. MyD88 expression and modification was determined by an in house developed ELISA**

| Myd88   | CONTROLS   |            |             |            |            |
|---------|------------|------------|-------------|------------|------------|
|         | day0       | 24 hrs     |             | 48 hrs     |            |
|         |            | control 24 | OM 10 ug/ml | control 48 | OM 10 ug   |
| control |            |            |             |            |            |
| control |            |            |             |            |            |
| h1      | 165473     | 184297     | 160143      | 198574     | 203752     |
| h2      | 142537     | 132464     | 149968      | 176453     | 214231     |
| h3      | 156342     | 160143     | 176453      | 143527     | 177564     |
| h4      | 114967     | 128374     | 142561      | 142364     | 154928     |
| h5      | 152436     | 166430     | 164735      | 198672     | 186252     |
| h6      | 169584     | 160143     | 164444      | 217684     | 221761     |
| mean    | 150223.167 | 155308.412 | 159717.399  | 179545.667 | 193081.333 |

**Analysis controls: ratio day 0 / 24 / 48 hrs**

| control | 24 hrs     |             | 48 hrs     |            |
|---------|------------|-------------|------------|------------|
|         | control 24 | OM 10 ug/ml | control 48 | OM 10 ug   |
| control |            |             |            |            |
| control |            |             |            |            |
| h1      | 111.375764 | 96.7789404  | 120.003868 | 123.133079 |
| h2      | 92.933063  | 105.213383  | 123.794524 | 150.298519 |
| h3      | 102.431219 | 112.863466  | 91.8032263 | 113.574088 |
| h4      | 111.661607 | 124.00167   | 123.830317 | 134.75867  |
| h5      | 109.179998 | 108.068304  | 130.331418 | 122.183736 |
| h6      | 94.4328569 | 96.9692766  | 128.363525 | 130.767643 |
| mean    | 103.669085 | 107.31584   | 119.687813 | 129.119289 |
| sem     | 4.86994777 | 5.95682932  | 8.1659038  | 7.34243084 |

**COPD**

| I  | day0   | 24 hrs     |             | 48 hrs     |          |
|----|--------|------------|-------------|------------|----------|
|    |        | control 24 | OM 10 ug/ml | control 48 | OM 10 ug |
| I  |        |            |             |            |          |
| c1 | 198675 | 217264     | 195553      | 210697     | 226175   |
| c2 | 110895 | 109679     | 165333      | 142365     | 152438   |
| c3 | 216643 | 228347     | 201462      | 238107     | 217564   |
| c4 | 178539 | 198674     | 127164      | 197236     | 210985   |
| c5 | 110978 | 114875     | 124178      | 132978     | 148275   |
| c6 | 109685 | 129594     | 142686      | 123351     | 130075   |

|      |        |        |        |        |        |
|------|--------|--------|--------|--------|--------|
| c7   | 164739 | 176453 | 129781 | 168664 | 187564 |
| c8   | 109786 | 96572  | 137727 | 126328 | 132467 |
| mean | 149993 | 158932 | 152985 | 167466 | 175693 |

#### Analysis COPD: ratio day 0 / 24 / 48 hrs

|      | 24 hrs     |                | 48 hrs     |            |
|------|------------|----------------|------------|------------|
|      | control 24 | OM 10<br>ug/ml | control 48 | OM 10 ug   |
| c4   | 111.277648 | 71.2247744     | 110.472222 | 118.17306  |
| c5   | 103.511107 | 111.89453      | 119.823749 | 133.607562 |
| c6   | 118.151257 | 130.086734     | 112.459315 | 118.589597 |
| c7   | 107.110642 | 78.7798311     | 102.382557 | 113.85525  |
| c8   | 87.9636857 | 125.45032      | 115.067495 | 120.659283 |
| mean | 105.209618 | 107.243408     | 113.067771 | 119.576642 |
| sem  | 5.18801988 | 15.4525235     | 4.70335748 | 6.7374506  |

#### Asthma

| I    | I<br>day0  | 24 hrs     |                | 48 hrs     |            |
|------|------------|------------|----------------|------------|------------|
|      |            | control 24 | OM 10<br>ug/ml | control 48 | OM 10 ug   |
| a1   | 117236     | 120967     | 138376         | 126385     | 137691     |
| a2   | 132454     | 127465     | 142309         | 140680     | 135904     |
| a3   | 109685     | 118613     | 139935         | 118734     | 142879     |
| a4   | 117587     | 117163     | 125947         | 124231     | 121228     |
| a5   | 130895     | 139286     | 145398         | 129786     | 136341     |
| a6   | 164538     | 167930     | 153648         | 170065     | 176426     |
| a7   | 110986     | 126959     | 134256         | 112453     | 154496     |
| mean | 126197.286 | 131197.419 | 139981.313     | 131762     | 143566.408 |

#### Analysis asthma: ratio day 0 / 24 / 48 hrs

|      | 24 hrs     |                | 48 hrs     |            |
|------|------------|----------------|------------|------------|
|      | control 24 | OM 10<br>ug/ml | control 48 | OM 10 ug   |
| a3   | 108.139594 | 127.578976     | 108.249989 | 130.263261 |
| a4   | 99.6394159 | 107.109789     | 105.650284 | 103.096069 |
| a5   | 106.410482 | 111.079873     | 99.152756  | 104.160325 |
| a6   | 102.061277 | 93.3814681     | 103.359102 | 107.225236 |
| a7   | 114.391736 | 120.966608     | 101.321788 | 139.203508 |
| mean | 104.294014 | 112.227005     | 104.535471 | 114.857221 |
| sem  | 3.44879821 | 6.46069367     | 1.96092367 | 8.49156211 |
